# Supplementary material for: AuNP and ssDNA capped mesoporous silica nanoparticles for laser controlled drug release
Source: PubMed Central journal article supplement — RSC Adv. 2019 Oct 29;9(60):34958–62. doi: 10.1039/c9ra07404j (PMC9074128; doi:10.1039/c9ra07404j), 2019-10-29
Supplement: RA-009-C9RA07404J-s001.pdf [file RA-009-C9RA07404J-s001.pdf]

**Electronic Supplementary Information (ESI)**

**AuNP and ssDNA Capped Mesoporous Silica Nanoparticles for  
Laser Controlled Drug Release**

**Lu Zhou <sup>a</sup>, Guojie Liu <sup>a</sup>, Yang Wang <sup>a</sup>, Jianling Liu <sup>a</sup>, Yajie Zhang <sup>a,b</sup>  
and Yong Ma <sup>\*a</sup>**

<sup>a</sup> Department of Chemistry, School of Fundamental Sciences, China  
Medical University, Shenyang 110122, China

<sup>b</sup> Department of gastroenterology, Shengjing Hospital of China Medical  
University, Shenyang 110004, China

\* Corresponding author. E-mail: yma10@cmu.edu.cn

## 1. Tables

The following parameters are derived from the product certificate of analysis.

**Table S1.** Properties of commercial gold nanoparticle (AuNP) purchased

|                |                 |
|----------------|-----------------|
| Diameter       | 3 nm            |
| Zeta potential | -39 mV          |
| Concentration  | 2.92E+14 nps/mL |
| Wt. conc.      | 0.050 mg/mL     |
| Molarity       | 467.9551 nM     |

**Table S2.** Properties of MCM-41 purchased

|                             |                                 |
|-----------------------------|---------------------------------|
| Specific surface area (SSA) | $\geq 800 \text{ m}^2/\text{g}$ |
| Pore volume                 | 0.9-1.25 $\text{cm}^3/\text{g}$ |
| Relative crystallinity      | $\geq 90\%$                     |
| Pore diameter               | 3-5 nm                          |
| Particle size               | 200 nm-1 $\mu\text{m}$          |

## 2. Figures

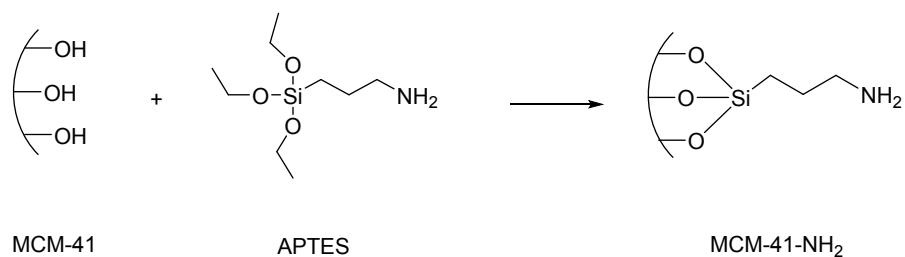

**Scheme S1.** Reaction formula of preparing MCM-41-NH<sub>2</sub>.

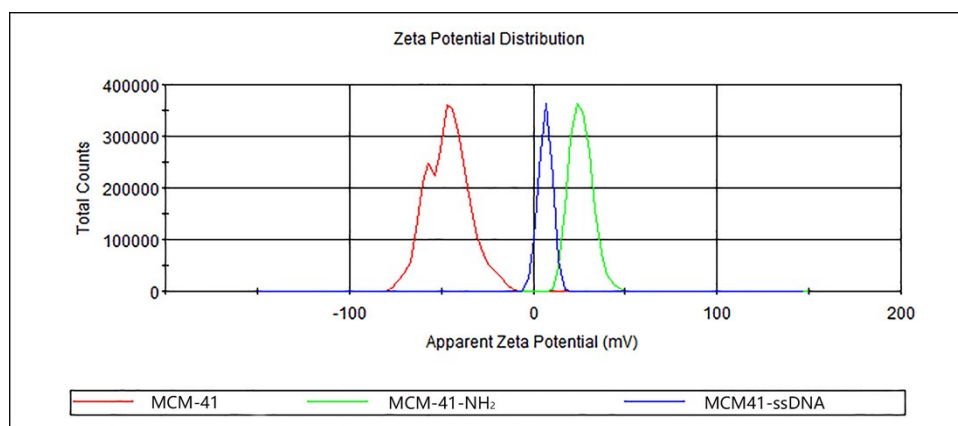

**Figure S1.** Zeta potential distributions of MCM-41, MCM-41-NH<sub>2</sub> and MCM-41-ssDNA.

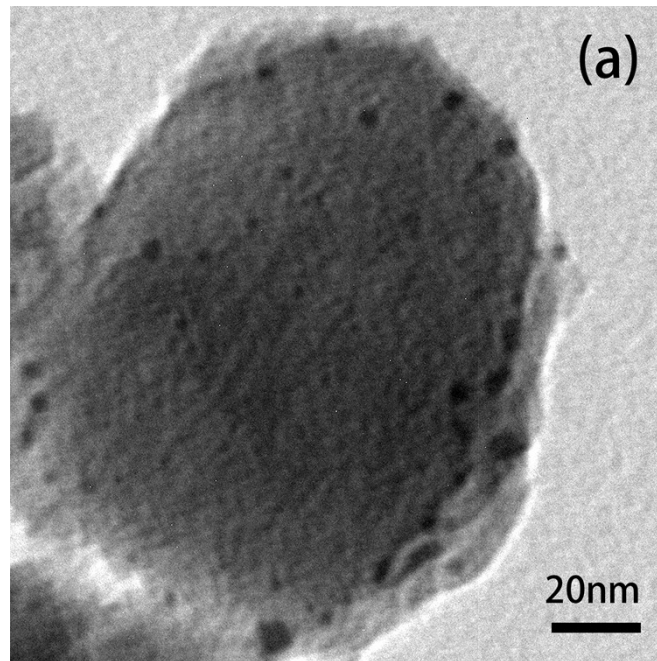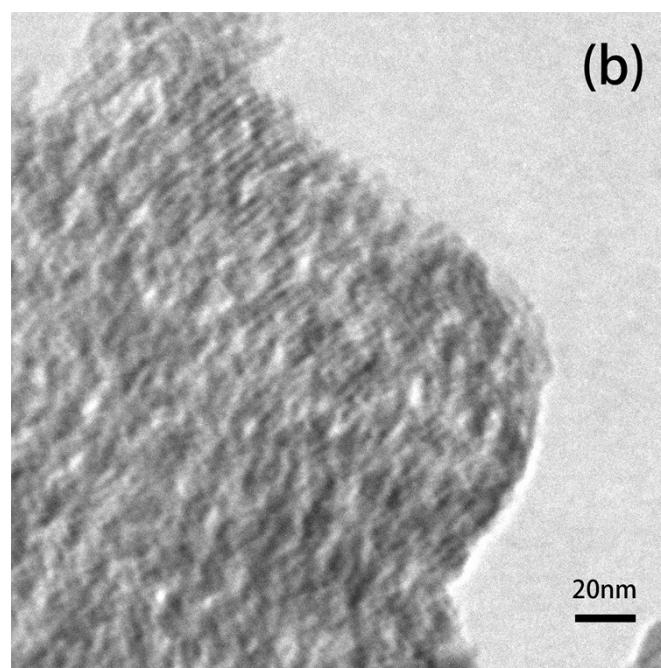

**Figure S2.** TEM images (a) of MCM-41-ssDNA-AuNP (loaded Dox) and (b) after MCM-41-ssDNA-AuNP was irradiated by 808 nm NIR laser

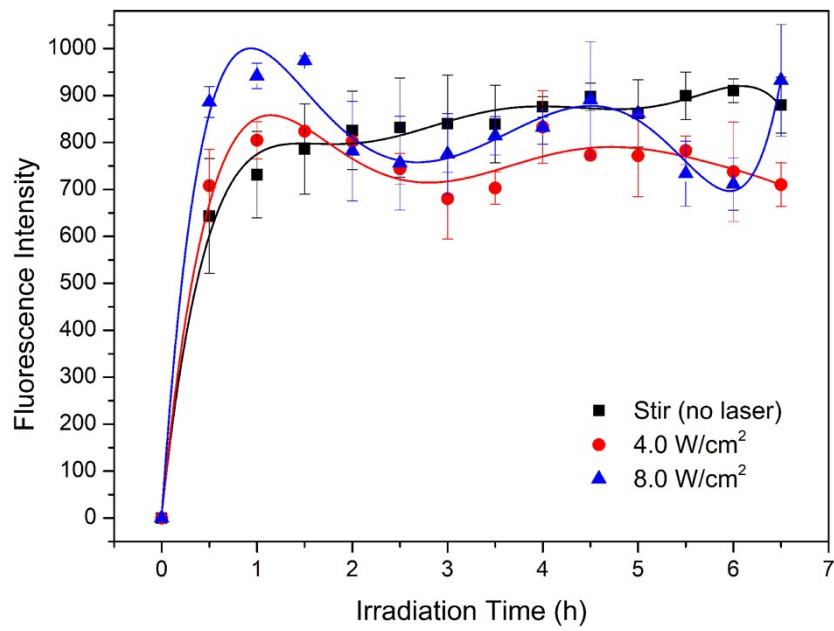

**Figure S3.** Fluorescence intensity curves of Dox release induced by laser irradiation on MCM-41/Dox without AuNP as the pore-cap.

Since there was no obstacle, MCM-41 allowed free access of the drug molecules, showing a wave of dynamic equilibrium.

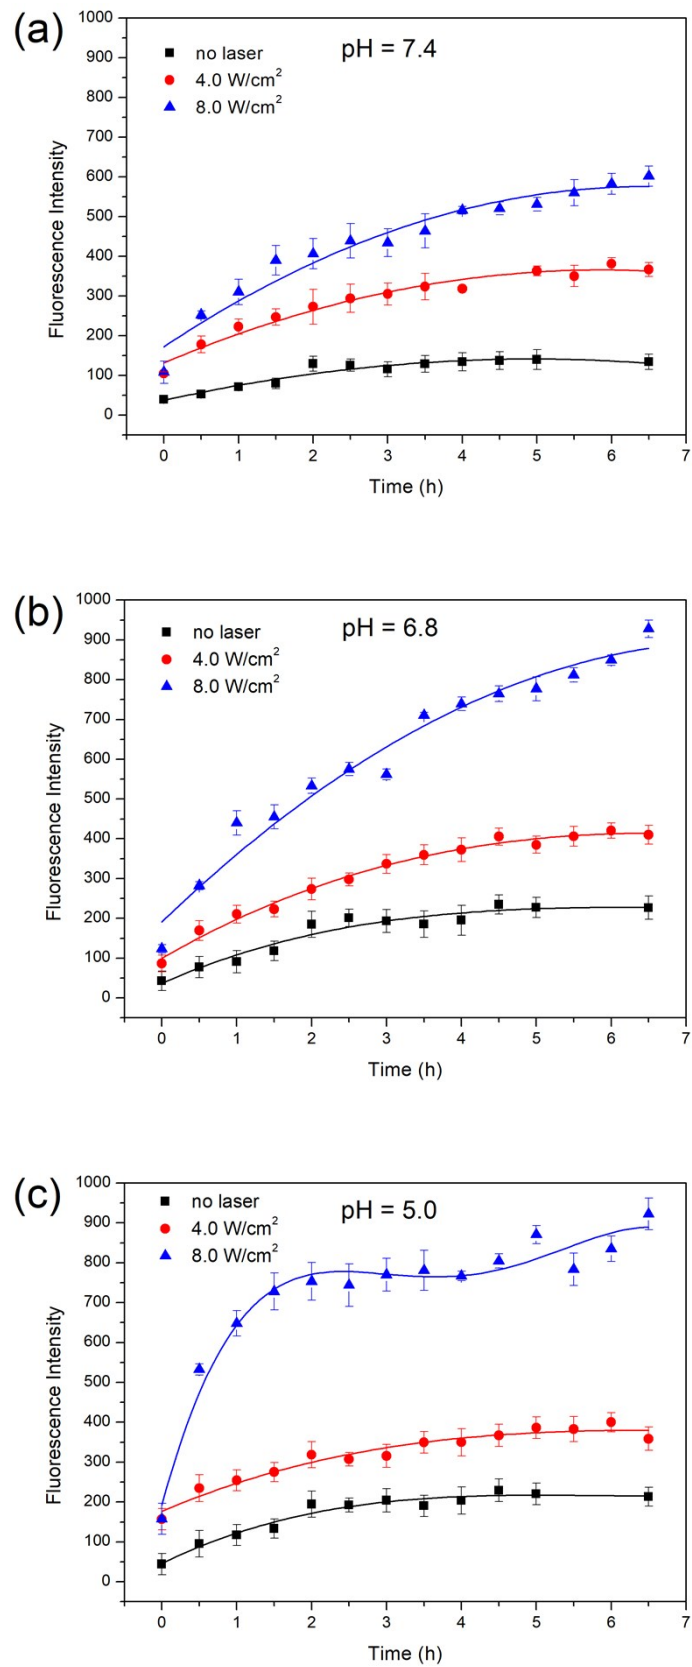

**Figure S4.** Fluorescence intensity curves of Dox release at (a) pH 7.4; (b) pH 6.8; (c) pH 5.0.
